# Supplementary material
Source: PubMed Central journal article supplement (PMC5966588)
Supplement: rspb20172714supp1.pdf [file rspb20172714supp1.pdf]

*Electronic Supplementary Material 1*

**A predicted interaction between odour pleasantness and intensity provides evidence for MHC social signalling in women**

*C. Wedekind, Department of Ecology and Evolution, Biophore, University of Lausanne, Lausanne, Switzerland*

**Supplementary Table S1.** Studies that tested experimentally for MHC-linked body or urinary odours and/or odour preferences in humans, based on a search in Web of Science ([www.webofknowledge.com](http://www.webofknowledge.com)), starting with the keywords “HLA” and “odour”, and examining studies that cited, or were cited by, the papers that matched the search criteria. The table summarizes the conclusions drawn by the authors of the respective paper, with “yes” = the authors concluded that they had found evidence for MHC-linked effects on odours or odour perception; “(yes)” = both sexes were included and analyses were not sex-specific; “.“ = link to MHC was not tested; “?” = the role of the MHC remained unclear because there was no statistically significant link. The column “Critique & authors’ reply” refers to commentary papers that specifically addressed aspects of the respective paper.

| Study                               | MHC-linked odours |       | MHC-linked odour perception |       | Comments                                                                                                                                           | Critique & authors' reply |
|-------------------------------------|-------------------|-------|-----------------------------|-------|----------------------------------------------------------------------------------------------------------------------------------------------------|---------------------------|
|                                     | men               | women | men                         | women |                                                                                                                                                    |                           |
| Gilbert et al. (1986) [1]           | .                 | .     | (yes)                       | (yes) | Humans evaluating odours of MHC-congenic mice.                                                                                                     |                           |
| Ferstl et al. (1992) [2]            | (yes)             | (yes) | .                           | yes   | Human urinary odours evaluated by rats; women reporting peculiar odour perception phenomena.                                                       |                           |
| Wedekind et al. (1995) [3]          | yes               | .     | .                           | yes   | Users of contraceptive Pill had different preferences than non-Pill users.                                                                         | [4], [5]                  |
| Wedekind & Füre (1997) [6]          | yes               | ?     | yes                         | yes   | No significant sex differences in MHC-linked preferences; strongest MHC-linked preference for one male odour ( $r^2 = 0.23$ ).                     |                           |
| Eggert et al. (1999) [7]            | yes               | yes   | .                           | .     | Human odours evaluated by rats and in gas chromatography.                                                                                          |                           |
| Milinski & Wedekind (2001) [8]      | .                 | .     | yes                         | yes   | MHC-linked preferences for some traditional perfume ingredients.                                                                                   |                           |
| Jacob et al. (2002) [9]             | yes               | .     | .                           | yes   | Preferences tested in a group of low genetic diversity.                                                                                            | [10], [11]                |
| Thornhill et al. (2003) [12]        | yes               | yes   | yes                         | yes   | Preferences of male odours linked to MHC heterozygosity, preferences of female odours linked to MHC similarity.                                    |                           |
| Santos et al. (2005) [13]           | yes               | ?     | ?                           | yes   | Potential effects of the contraceptive pill not included in analyses.                                                                              |                           |
| Pause et al. (2006) [14]            | yes               | yes   | yes                         | yes   | Analysing electroencephalograms with axillary hairs as odour samples.                                                                              |                           |
| Wedekind et al. 2007 [15]           | yes               | .     | ?                           | yes   | Descriptions of body odours by a female perfumer.                                                                                                  |                           |
| Roberts et al. (2008) [16]          | yes               | .     | .                           | yes   | Odour preferences shifted towards MHC similarity with use of the contraceptive Pill (as predicted in [3])                                          |                           |
| Janes et al. (2010) [17]            | ?                 | ?     | (yes)                       | (yes) | MHC-linked preferences to artificial scents, no significant link to body odours (the authors discuss ethnic diversity as potentially confounding). |                           |
| Natsch et al. (2010) [18]           | ?                 | ?     | .                           | .     | Testing for MHC effects on N-acylglutamine conjugates of volatile carboxylic acids secreted in the axilla.                                         |                           |
| Hämmerli et al. (2012) [19]         | .                 | .     | (yes)                       | (yes) | MHC-linked preferences for some traditional perfume ingredients                                                                                    |                           |
| Milinski et al. (2013) [20]         | .                 | .     | .                           | yes   | Supplementation of own body odour by synthesized MHC peptides.                                                                                     | [21], [22]                |
| Verhulst et al. (2013) [23]         | ?                 | .     | .                           | .     | Testing MHC effects on attractiveness of odours to mosquitoes.                                                                                     |                           |
| Probst et al. (2017) [24]           | .                 | ?     | ?                           | .     |                                                                                                                                                    | present paper             |
| Present reanalysis of Probst et al. | .                 | yes   | yes                         | .     |                                                                                                                                                    |                           |

The table only lists studies that tested for potential MHC effects on odours or odour preferences in humans. It does not list studies that tested for links between MHC and facial or skin characteristics [e.g. 25, 26, 27] or that tested for potential MHC effects on mate choice, sexual responsivity, or fertility in humans for which some studies did not find significant MHC effects [e.g. 28, 29] while others found statistically significant links to the MHC [e.g. 30, 31, 32-34].

## References cited

1. Gilbert A.N., Yamazaki K., Beauchamp G.K., Thomas L. 1986 Olfactory discrimination of mouse strains (*Mus musculus*) and major histocompatibility complex types by humans (*Homo sapiens*). *Journal of Comparative Psychology* **100**(3), 262-265. (doi:10.1037//0735-7036.100.3.262).
2. Ferstl R., Eggert F., Westphal E., Zavazava N., Muller-Ruchholtz W. 1992 MHC-related odors in humans. In *Chemical Signals in Vertebrates VI* (eds. Doty R.L., Müller-Schwarze D.), pp. 205-211. New York, Plenum.
3. Wedekind C., Seebeck T., Bettens F., Paepke A.J. 1995 MHC-dependent mate preferences in humans. *Proc. R. Soc. B Biol. Sci.* **260**(1359), 245-249. (doi:10.1098/rspb.1995.0087).
4. Hedrick P.W., Loeschcke V. 1996 MHC and mate selection in humans? *Trends Ecol. Evol.* **11**(1), 24.
5. Wedekind C., Seebeck T. 1996 MHC and mate selection in humans? Reply. *Trends Ecol. Evol.* **11**(1), 24-25. (doi:10.1016/0169-5347(96)80237-0).
6. Wedekind C., Furi S. 1997 Body odour preferences in men and women: do they aim for specific MHC combinations or simply heterozygosity? *Proc. R. Soc. B Biol. Sci.* **264**(1387), 1471-1479. (doi:10.1098/rspb.1997.0204).
7. Eggert F., Luszyk D., Haberkorn K., Wobst B., Vostrowsky O., Westphal E., Bestmann H.J., Muller-Ruchholtz W., Ferstl R. 1999 The major histocompatibility complex and the chemosensory signalling of individuality in humans. *Genetica* **104**(3), 265-273. (doi:10.1023/a:1026431303879).
8. Milinski M., Wedekind C. 2001 Evidence for MHC-correlated perfume preferences in humans. *Behav. Ecol.* **12**(2), 140-149. (doi:10.1093/beheco/12.2.140).
9. Jacob S., McClintock M.K., Zelano B., Ober C. 2002 Paternally inherited HLA alleles are associated with women's choice of male odor. *Nat. Genet.* **30**, 175-179.
10. Wedekind C. 2002 The MHC and body odors: arbitrary effects caused by shifts of mean pleasantness. *Nat. Genet.* **31**, 237.
11. McClintock M.K., Schumm P., Jacob S., Zelano B., Ober C. 2002 The MHC and body odors: arbitrary effects caused by shifts of mean pleasantness - Reply. *Nat. Genet.* **31**(3), 237-238. (doi:10.1038/ng0702-237b).
12. Thornhill R., Gangestad S.W., Miller R., Scheyd G., McCollough J.K., Franklin M. 2003 Major histocompatibility complex genes, symmetry, and body scent attractiveness in men and women. *Behav. Ecol.* **14**(5), 668-678. (doi:10.1093/beheco/arg043).
13. Santos P.S.C., Schinemann J.A., Gabardo J., Bicalho M.D. 2005 New evidence that the MHC influences odor perception in humans: a study with 58 Southern Brazilian students. *Horm. Behav.* **47**(4), 384-388.
14. Pause B.M., Krauel K., Schraders C., Sojka B., Westphal E., Muller-Ruchholtz W., Ferstl R. 2006 The human brain is a detector of chemosensorily transmitted HLA-class I-similarity in same- and opposite-sex relations. *Proc. R. Soc. B Biol. Sci.* **273**(1585), 471-478. (doi:10.1098/rspb.2005.3342).
15. Wedekind C., Escher S., Van de Waal M., Frei E. 2007 The major histocompatibility complex and perfumers' descriptions of human body odors. *Evol. Psychol.* **5**, 330-343.
16. Roberts S.C., Gosling L.M., Carter V., Petrie M. 2008 MHC-correlated odour preferences in humans and the use of oral contraceptives. *Proc. R. Soc. B Biol. Sci.* **275**, 2715-2722.
17. Janes D., Klun I., Vidan-Jeras B., Jeras M., Kreft S. 2010 Influence of MHC on odour perception of 43 chemicals and body odour. *Central European Journal of Biology* **5**(3), 324-330. (doi:10.2478/s11535-010-0020-6).
18. Natsch A., Kuhn F., Tiercy J.M. 2010 Lack of evidence for HLA-linked patterns of odorous carboxylic acids released from glutamine conjugates secreted in the human axilla. *Journal of Chemical Ecology* **36**(8), 837-846. (doi:10.1007/s10886-010-9826-y).
19. Hämmerli A., Schweisgut C., Kaegi M. 2012 Population genetic segmentation of MHC-correlated perfume preferences. *International Journal of Cosmetic Science* **34**(2), 161-168. (doi:10.1111/j.1468-2494.2011.00696.x).

20. Milinski M., Croy I., Hummel T., Boehm T. 2013 Major histocompatibility complex peptide ligands as olfactory cues in human body odour assessment. *Proc. R. Soc. B Biol. Sci.* **280**(1755). (doi:10.1098/rspb.2012.2889).
21. Natsch A. 2014 A human chemosensory modality to detect peptides in the nose? *Proc. R. Soc. B Biol. Sci.* **281**(1776). (doi:10.1098/rspb.2013.1678).
22. Milinski M., Croy I., Hummel T., Boehm T. 2014 Reply to A human chemo-sensory modality to detect peptides in the nose? by A. Natsch. *Proc. R. Soc. B Biol. Sci.* **281**(1776). (doi:10.1098/rspb.2013.2816).
23. Verhulst N.O., Beijleveld H., Qiu Y.T., Maliepaard C., Verduyn W., Haasnoot G.W., Claas F.H.J., Mumm R., Bouwmeester H.J., Takken W., et al. 2013 Relation between HLA genes, human skin volatiles and attractiveness of humans to malaria mosquitoes. *Infection Genetics and Evolution* **18**, 87-93. (doi:10.1016/j.meegid.2013.05.009).
24. Probst F., Fischbacher U., Lobmaier J.S., Wirthmüller U., Knoch D. 2017 Men's preferences for women's body odours are not associated with human leucocyte antigen. *Proc. R. Soc. B Biol. Sci.* **284**, 20171830. (doi:10.1098/rspb.2017.1830).
25. Roberts S.C., Little A.C., Gosling L.M., Jones B.C., Perrett D.I., Carter V., Petrie M. 2005 MHC-assortative facial preferences in humans. *Biol. Lett.* **1**(4), 400-403.
26. Roberts S.C., Little A.C., Gosling L.M., Perrett D.I., Carter V., Jones B.C., Penton-Voak I., Petrie M. 2005 MHC-heterozygosity and human facial attractiveness. *Evol. Hum. Behav.* **26**(3), 213-226.
27. Lie H.C., Simmons L.W., Rhodes G. 2010 Genetic dissimilarity, genetic diversity, and mate preferences in humans. *Evol. Hum. Behav.* **31**(1), 48-58. (doi:10.1016/j.evolhumbehav.2009.07.001).
28. Hedrick P.W., Black F.L. 1997 HLA and mate selection: No evidence in South Amerindians. *Am. J. Hum. Genet.* **61**(3), 505-511.
29. Ihara Y., Aoki K., Tokunaga K., Takahashi K., Juji T. 2000 HLA and human mate choice: Tests on Japanese couples. *Anthropological Science* **108**(2), 199-214.
30. Ober C., Elias S., Kostyu D.D., Hauck W.W. 1992 Decreased fecundability in Hutterite couples sharing HLA-DR. *Am. J. Hum. Genet.* **50**(1), 6-14.
31. Ober C., Weitkamp L.R., Cox N., Dytch H., Kostyu D., Elias S. 1997 HLA and mate choice in humans. *Am. J. Hum. Genet.* **61**(3), 497-504.
32. Garver-Apgar C.E., Gangestad S.W., Thornhill R., Miller R.D., Olp J.J. 2006 Major histocompatibility complex alleles, sexual responsiveness, and unfaithfulness in romantic couples. *Psychological Science* **17**(10), 830-835. (doi:10.1111/j.1467-9280.2006.01789.x).
33. Kromer J., Hummel T., Pietrowski D., Giani A.S., Sauter J., Ehninger G., Schmidt A.H., Croy I. 2016 Influence of HLA on human partnership and sexual satisfaction. *Sci. Rep.* **6**, 32550. (doi:10.1038/srep32550).
34. Sapphire-Bernstein S., Larson C.M., Gildersleeve K.A., Fales M.R., Pillsworth E.G., Haselton M.G. 2017 Genetic compatibility in long-term intimate relationships: partner similarity at major histocompatibility complex (MHC) genes may reduce in-pair attraction. *Evol. Hum. Behav.* **38**, 190-196. (doi:10.1016/j.evolhumbehav.2016.09.003).
