# Supplementary material
Source: PubMed Central journal article supplement (PMC5966588)
Supplement: rspb20172714supp2.pdf [file rspb20172714supp2.pdf]

*Electronic Supplementary Material 2*

**A predicted interaction between odour pleasantness and intensity provides evidence for MHC social signalling in women**

*C. Wedekind, Department of Ecology and Evolution, Biophore, University of Lausanne, Lausanne, Switzerland*

**Supplementary Figure S1.** Pleasantness versus intensity of body odour of MHC-dissimilar (black symbols and line) and MHC-similar pairs (grey symbols and line) of odour donor and rater in Probst et al. [1]. The lines show the regressions. See Table 1 for statistics.

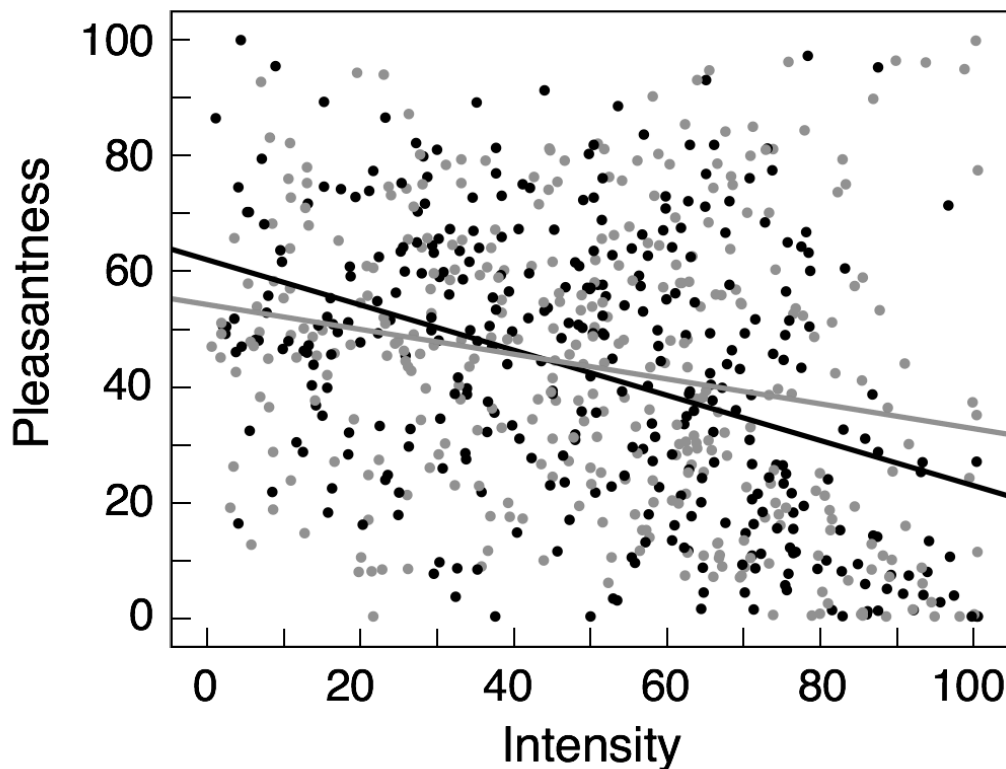

**Literature cited**

1. Probst F., Fischbacher U., Lobmaier J.S., Wirthmüller U., Knoch D. 2017 Data from: Men's preferences for women's body odours are not associated with HLA. In *Dryad Digital Repository* (10.5061/dryad.270h8)
