# Supplementary material
Source: PubMed Central journal article supplement (PMC5966588)
Supplement: rspb20172714supp3.pdf [file rspb20172714supp3.pdf]

### Electronic Supplementary Material 3

## A predicted interaction between odour pleasantness and intensity provides evidence for MHC social signalling in women

C. Wedekind, Department of Ecology and Evolution, Biophore, University of Lausanne, Lausanne, Switzerland

**Supplementary Table S2:** Mixed-effects analyses of pleasantness scorings in the combined datasets of Probst et al. [1] and Wedekind et al. [2], testing the effects of the sharing of MHC antigens between donor and rater (dissimilar versus similar; “MHC”), odour intensity (“intensity”), and “study” (Probst et al. [1] versus Wedekind et al. [2]) as fixed factors, and rater identity or donor identity (“ID”) as random factors. The proportions of the total variance explained are based on REML variance component estimates (unbounded). Significant p-values are marked in bold.

| Fixed factors                | Pleasantness <sup>1</sup> |                  | Pleasantness <sup>2</sup> |                  |
|------------------------------|---------------------------|------------------|---------------------------|------------------|
|                              | F                         | p                | F                         | p                |
| MHC                          | 2.0                       | 0.16             | 1.0                       | 0.33             |
| Intensity                    | 120.2                     | <b>&lt;0.001</b> | 64.5                      | <b>&lt;0.001</b> |
| MHC x intensity              | 4.1                       | <b>0.05</b>      | 5.2                       | <b>0.02</b>      |
| Study                        | 35.0                      | <b>&lt;0.001</b> | 15.2                      | <b>&lt;0.001</b> |
| Study x MHC                  | 5.3                       | <b>0.02</b>      | 5.6                       | <b>0.02</b>      |
| Study x intensity            | 2.2                       | 0.14             | 5.3                       | <b>0.03</b>      |
| Study x MHC x intensity      | 0.1                       | 0.72             | 0.01                      | 0.91             |
| <i>Random factors</i>        |                           |                  |                           |                  |
| ID                           | 0%                        |                  | 5.7%                      |                  |
| ID x MHC                     | 1.9%                      |                  | 0%                        |                  |
| ID x intensity               | 0%                        |                  | 0%                        |                  |
| ID x MHC x intensity         | 54.9%                     |                  | 0%                        |                  |
| ID x study                   | 2.9%                      |                  | 0%                        |                  |
| ID x study x MHC             | 0%                        |                  | 4.9%                      |                  |
| ID x study x intensity       | 37.3%                     |                  | 45.4%                     |                  |
| ID x study x MHC x intensity | 0%                        |                  | 40.7%                     |                  |
| Residual                     | 3.0%                      |                  | 3.3%                      |                  |

<sup>1</sup> with rater identity as random factor; <sup>2</sup> with donor identity as random factor

### Literature cited

1. Probst F., Fischbacher U., Lobmaier J.S., Wirthmüller U., Knoch D. 2017 Data from: Men’s preferences for women’s body odours are not associated with HLA. In *Dryad Digital Repository* (10.5061/dryad.270h8)
2. Wedekind C., Seebeck T., Bettens F., Paepke A.J. 1995 Data from: MHC-dependent mate preferences in humans. In *Dryad Digital Repository* (10.5061/dryad.r87pq)
